# Supplementary material for: Agriculture Waste as Slow Carbon Releasing Source of Mixotrophic Denitrification Process for Treating Low C/N Wastewater
Source: MDPI journal article supplement (doi:10.3390/separations9100323), 2022-10-21
Supplement: s1 [file s1]

# **Agriculture waste as slow carbon releasing source of mixotrophic denitrification process for treating low C/N wastewater**

Xiaohong Hong<sup>a</sup>, Liaofan Tang<sup>b</sup>, Haixia Feng<sup>c</sup>, Xiaolei Zhang<sup>b\*</sup>, Xianqiong Hu<sup>c</sup>

<sup>a</sup> Guanlan River Watershed Management Center of Shenzhen River, Longgang District,  
Shenzhen 518172, China

<sup>b</sup> Department of Civil and Environmental Engineering, Harbin Institute of Technology,  
Shenzhen 518055, China

<sup>c</sup> Shenzhen Municipal Engineering Consulting Center CO., LTD, Shenzhen 518028, China

\*Corresponding author: Tel: +86-(755)-2603-2692; Fax: +86-(755)-2670-3651

Email: xiaolei.zhang2016@foxmail.com

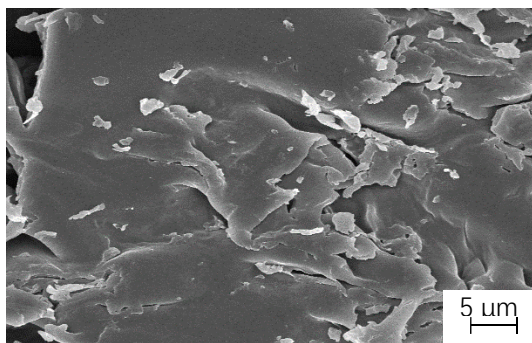

(a) original corncob surface (×2000)

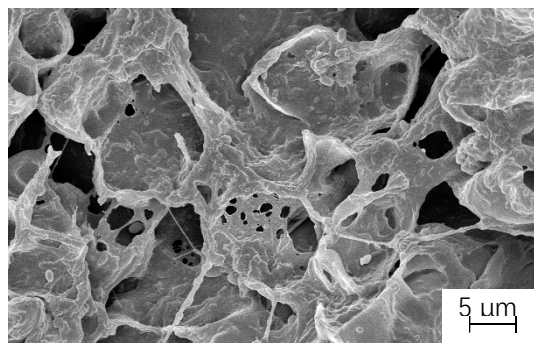

(b) corncob with biofilm (×2000)

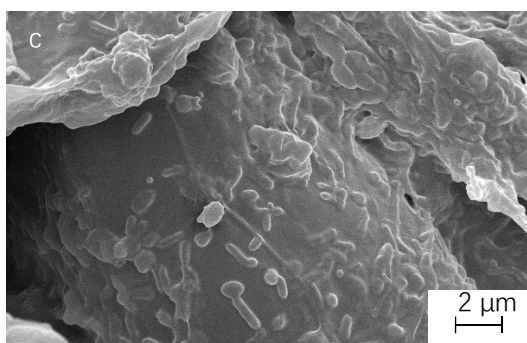

(c) corn cob with biofilm ( $\times 5000$ )

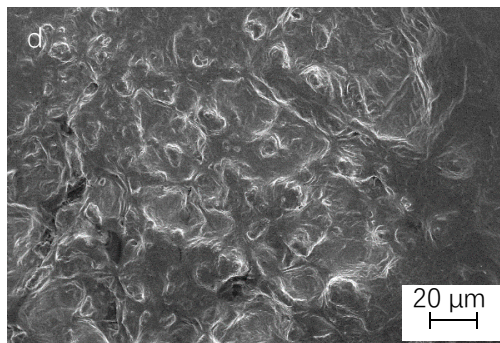

(d) original  $S^0$  surface ( $\times 500$ )

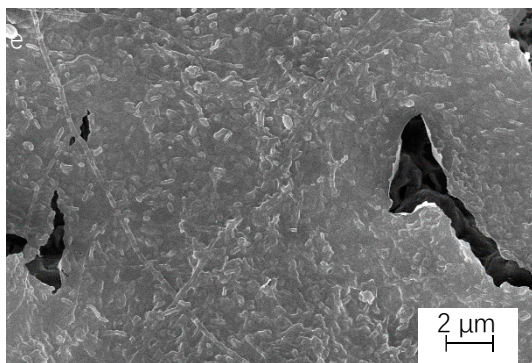

(e)  $S^0$  with biofilm ( $\times 2000$ )

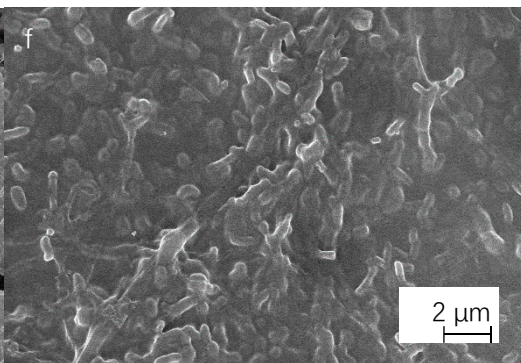

(f)  $S^0$  with biofilm ( $\times 5000$ )

Figure S1 The surface SEM image of corn cob and  $S^0$
